# Supplementary material for: Functional Categories Associated with Clusters of Genes That Are Co-Expressed across the NCI-60 Cancer Cell Lines
Source: PubMed Central journal article supplement (PMC3265467; doi:10.1371/journal.pone.0030317), 2012-01-24
Supplement: pone.0030317.s006.pdf [file pone.0030317.s006.pdf]

Table S5. The gross distribution of GO categories resulting from running GoMiner on all 300 clusters

| Cluster number                                    | Number of clusters in cuts |      |      |      |
|---------------------------------------------------|----------------------------|------|------|------|
|                                                   | 20                         | 40   | 80   | 160  |
| 1                                                 | 0                          | 0    | 11   | 12   |
| 2                                                 | 5                          | 13   | 18   | 0    |
| 3                                                 | 0                          | 0    | 0    | 0    |
| 4                                                 | 27                         | 27   | 0    | 0    |
| 5                                                 | 10                         | 2    | 0    | 5    |
| 6                                                 | 0                          | 0    | 0    | 1    |
| 7                                                 | 3                          | 2    | 0    | 0    |
| 8                                                 | 1                          | 5    | 30   | 30   |
| 9                                                 | 0                          | 0    | 0    | 0    |
| 10                                                | 40                         | 0    | 0    | 0    |
| 11                                                | 0                          | 23   | 12   | 11   |
| 12                                                | 0                          | 0    | 0    | 0    |
| 13                                                | 7                          | 0    | 0    | 1    |
| 14                                                | 0                          | 0    | 0    | 0    |
| 15                                                | 8                          | 0    | 14   | 0    |
| 16                                                | 24                         | 0    | 0    | 0    |
| 17                                                | 12                         | 0    | 17   | 0    |
| 18                                                | 2                          | 0    | 0    | 0    |
| 19                                                | 0                          | 13   | 0    | 0    |
| 20                                                | 0                          | 56   | 0    | 1    |
| 21                                                | NA                         | 5    | 12   | 0    |
| 22                                                | NA                         | 2    | 17   | 0    |
| 23                                                | NA                         | 21   | 3    | 0    |
| 24                                                | NA                         | 0    | 0    | 0    |
| 25                                                | NA                         | 2    | 0    | 1    |
| 26                                                | NA                         | 0    | 92   | 1    |
| 27                                                | NA                         | 2    | 1    | 0    |
| 28                                                | NA                         | 0    | 26   | 0    |
| 29                                                | NA                         | 0    | 0    | 86   |
| 30                                                | NA                         | 11   | 1    | 2    |
| 31                                                | NA                         | 2    | 0    | 0    |
| 32                                                | NA                         | 0    | 7    | 7    |
| 33                                                | NA                         | 0    | 0    | 0    |
| 34                                                | NA                         | 0    | 0    | 41   |
| 35                                                | NA                         | 17   | 0    | 1    |
| 36                                                | NA                         | 0    | 0    | 0    |
| 37                                                | NA                         | 3    | 0    | 0    |
| 38                                                | NA                         | 29   | 15   | 0    |
| 39                                                | NA                         | 34   | 0    | 0    |
| 40                                                | NA                         | 0    | 0    | 4    |
| 41                                                | NA                         | NA   | 1    | 0    |
| 42                                                | NA                         | NA   | 17   | 0    |
| 43                                                | NA                         | NA   | 12   | 0    |
| 44                                                | NA                         | NA   | 2    | 0    |
| 45                                                | NA                         | NA   | 0    | 13   |
| 46                                                | NA                         | NA   | 3    | 0    |
| 47                                                | NA                         | NA   | 0    | 0    |
| 48                                                | NA                         | NA   | 0    | 0    |
| 49                                                | NA                         | NA   | 2    | 14   |
| 50                                                | NA                         | NA   | 0    | 0    |
| 51                                                | NA                         | NA   | 29   | 1    |
| 52                                                | NA                         | NA   | 0    | 60   |
| 53                                                | NA                         | NA   | 2    | 20   |
| 54                                                | NA                         | NA   | 0    | 0    |
| 55                                                | NA                         | NA   | 7    | 0    |
| 56                                                | NA                         | NA   | 0    | 0    |
| 57                                                | NA                         | NA   | 26   | 0    |
| 58                                                | NA                         | NA   | 0    | 2    |
| 59                                                | NA                         | NA   | 0    | 2    |
| 60                                                | NA                         | NA   | 0    | 0    |
| 61                                                | NA                         | NA   | 0    | 0    |
| 62                                                | NA                         | NA   | 0    | 2    |
| 63                                                | NA                         | NA   | 0    | 0    |
| 64                                                | NA                         | NA   | 0    | 0    |
| 65                                                | NA                         | NA   | 0    | 0    |
| 66                                                | NA                         | NA   | 0    | 2    |
| 67                                                | NA                         | NA   | 0    | 0    |
| 68                                                | NA                         | NA   | 0    | 32   |
| 69                                                | NA                         | NA   | 2    | 11   |
| 70                                                | NA                         | NA   | 0    | 4    |
| 71                                                | NA                         | NA   | 0    | 1    |
| 72                                                | NA                         | NA   | 1    | 22   |
| 73                                                | NA                         | NA   | 0    | 0    |
| 74                                                | NA                         | NA   | 4    | 0    |
| 75                                                | NA                         | NA   | 5    | 0    |
| 76                                                | NA                         | NA   | 2    | 0    |
| 77                                                | NA                         | NA   | 2    | 1    |
| 78                                                | NA                         | NA   | 22   | 0    |
| 79                                                | NA                         | NA   | 36   | 0    |
| 80                                                | NA                         | NA   | 19   | 18   |
| 81                                                | NA                         | NA   | NA   | 11   |
| 82                                                | NA                         | NA   | NA   | 0    |
| 83                                                | NA                         | NA   | NA   | 1    |
| 84                                                | NA                         | NA   | NA   | 12   |
| 85                                                | NA                         | NA   | NA   | 0    |
| 86                                                | NA                         | NA   | NA   | 0    |
| 87                                                | NA                         | NA   | NA   | 0    |
| 88                                                | NA                         | NA   | NA   | 0    |
| 89                                                | NA                         | NA   | NA   | 0    |
| 90                                                | NA                         | NA   | NA   | 0    |
| 91                                                | NA                         | NA   | NA   | 0    |
| 92                                                | NA                         | NA   | NA   | 0    |
| 93                                                | NA                         | NA   | NA   | 0    |
| 94                                                | NA                         | NA   | NA   | 0    |
| 95                                                | NA                         | NA   | NA   | 36   |
| 96                                                | NA                         | NA   | NA   | 0    |
| 97                                                | NA                         | NA   | NA   | 6    |
| 98                                                | NA                         | NA   | NA   | 1    |
| 99                                                | NA                         | NA   | NA   | 0    |
| 100                                               | NA                         | NA   | NA   | 0    |
| 101                                               | NA                         | NA   | NA   | 0    |
| 102                                               | NA                         | NA   | NA   | 0    |
| 103                                               | NA                         | NA   | NA   | 0    |
| 104                                               | NA                         | NA   | NA   | 86   |
| 105                                               | NA                         | NA   | NA   | 9    |
| 106                                               | NA                         | NA   | NA   | 0    |
| 107                                               | NA                         | NA   | NA   | 0    |
| 108                                               | NA                         | NA   | NA   | 0    |
| 109                                               | NA                         | NA   | NA   | 30   |
| 110                                               | NA                         | NA   | NA   | 0    |
| 111                                               | NA                         | NA   | NA   | 0    |
| 112                                               | NA                         | NA   | NA   | 1    |
| 113                                               | NA                         | NA   | NA   | 0    |
| 114                                               | NA                         | NA   | NA   | 21   |
| 115                                               | NA                         | NA   | NA   | 0    |
| 116                                               | NA                         | NA   | NA   | 0    |
| 117                                               | NA                         | NA   | NA   | 1    |
| 118                                               | NA                         | NA   | NA   | 0    |
| 119                                               | NA                         | NA   | NA   | 0    |
| 120                                               | NA                         | NA   | NA   | 0    |
| 121                                               | NA                         | NA   | NA   | 2    |
| 122                                               | NA                         | NA   | NA   | 4    |
| 123                                               | NA                         | NA   | NA   | 5    |
| 124                                               | NA                         | NA   | NA   | 1    |
| 125                                               | NA                         | NA   | NA   | 0    |
| 126                                               | NA                         | NA   | NA   | 0    |
| 127                                               | NA                         | NA   | NA   | 0    |
| 128                                               | NA                         | NA   | NA   | 0    |
| 129                                               | NA                         | NA   | NA   | 0    |
| 130                                               | NA                         | NA   | NA   | 3    |
| 131                                               | NA                         | NA   | NA   | 0    |
| 132                                               | NA                         | NA   | NA   | 20   |
| 133                                               | NA                         | NA   | NA   | 0    |
| 134                                               | NA                         | NA   | NA   | 23   |
| 135                                               | NA                         | NA   | NA   | 3    |
| 136                                               | NA                         | NA   | NA   | 0    |
| 137                                               | NA                         | NA   | NA   | 21   |
| 138                                               | NA                         | NA   | NA   | 0    |
| 139                                               | NA                         | NA   | NA   | 1    |
| 140                                               | NA                         | NA   | NA   | 5    |
| 141                                               | NA                         | NA   | NA   | 0    |
| 142                                               | NA                         | NA   | NA   | 7    |
| 143                                               | NA                         | NA   | NA   | 9    |
| 144                                               | NA                         | NA   | NA   | 1    |
| 145                                               | NA                         | NA   | NA   | 0    |
| 146                                               | NA                         | NA   | NA   | 0    |
| 147                                               | NA                         | NA   | NA   | 0    |
| 148                                               | NA                         | NA   | NA   | 1    |
| 149                                               | NA                         | NA   | NA   | 1    |
| 150                                               | NA                         | NA   | NA   | 0    |
| 151                                               | NA                         | NA   | NA   | 2    |
| 152                                               | NA                         | NA   | NA   | 0    |
| 153                                               | NA                         | NA   | NA   | 0    |
| 154                                               | NA                         | NA   | NA   | 23   |
| 155                                               | NA                         | NA   | NA   | 20   |
| 156                                               | NA                         | NA   | NA   | 0    |
| 157                                               | NA                         | NA   | NA   | 7    |
| 158                                               | NA                         | NA   | NA   | 0    |
| 159                                               | NA                         | NA   | NA   | 2    |
| 160                                               | NA                         | NA   | NA   | 9    |
| Total                                             | 139                        | 269  | 470  | 794  |
| Fraction of clusters having at least one category | 0.55                       | 0.47 | 0.42 | 0.41 |

"NA" indicates that the cluster number was not part of the cut. For example, in the column for the 20 cut, row 21 is designated as "NA" since there was no cluster 21 in that cut.

The count of categories given here is based upon the HTGM .report file, which, in contrast to the CIMs, is not filtered for large generic categories. In principle, as the number of clusters in a cut increases, there are three competing factors at play in determining the number of HTGM categories:

1. the statistical power of HTGM is decreased as the number of genes *per* cluster decreases
2. noise, and therefore spurious categories, might increase as the number of genes *per* cluster decreases
3. the genes in a cluster are "purified" in that "contaminating" genes might be removed

We find that in fact the total number of HTGM categories increases roughly proportionately so apparently (2) and (3) predominate. But that trend does not continue indefinitely, since the total for a 320 cut set of clusters (data not shown) is 1,086.
